# Supplementary material for: Are the classic false belief tasks cursed? Young children are just as likely as older children to pass a false belief task when they are not required to overcome the curse of knowledge
Source: PLoS One. 2021 Feb 19;16(2):e0244141. doi: 10.1371/journal.pone.0244141 (PMC7894954; doi:10.1371/journal.pone.0244141)
Supplement: S1 Raw data — (CSV) [file pone.0244141.s002.csv]

ID	DOEdd.mm.yy	ExperimentLocation	Sex	Version	AgeMonths	AgeYrs	Ethnicity	SallyRyanQ1	SallyRyanQ2	Q2SallyRyanWhere	Q2SallyRyanGuessing	SallyRyanQ3	SallyRyanQ4	Q4SallyRyanWhere	BillJaneQ1	BillJaneQ2	Q2BillJaneWhere	Q2BillJaneGuessing	BillJaneQ3	BillJaneQ4	Q4BillJaneWhere	JennyJoeQ1	JennyJoeQ2	Q2JennyJoeWhere	Q2JennyJoeGuessing	JennyJoeQ3	JennyJoeQ4	Q4JennyJoeWhere	RobKristyQ1	RobKristyQ2	Q2RobKristyWhere	Q2RobKristyGuessing	RobKristyQ3	RobKristyQ4	Q4RobKristyWhere	FBTask_Usable
83	4/10/2016	1	2	1	36	3	1				2	1	1									1	1		2	1			4	0			1	0		0
162	11/22/2016	1	2	1	36	3		3																												0
129	7/28/2016	1	2	1	36	3	1	4	1	2	2	1	1	3	4	1	1	1	1			1	1	2	2	1	1	4	4	1	4	1	1	1	4	0
8	10/9/2015	1	1	1	36	3	1	4	1	4	2	0	1	2	4	1	4	1	0	1	3	2	1	1	2	0	1	1	1	0			0	1	1	1
54	2/26/2016	1	1	1	36	3	1	4	1	1	2	1	1	4	2	1	1	1	1	1	4	3	1	2	2	1	1	4	1	1	2	1	1	0		0
125	7/26/2016	1	2	1	37	3	1	3	1	3	2	1	1	1	4	1	4	1	1	1	3	3	1	3	2	1	1	1	3	1	3	1	1	1	1	1
62	3/9/2016	1	1	1	37	3	4	2	1	2	2	1	1	2	3	1	3	1	0	1	3	1	1	1	2	1	1	1	1	1	1	1	0	0		1
60	2/26/2016	1	2	1	38	3	2	2	1	2	2	0	1	1	1	1	1	1	0	1	1	1	1	1	2	0	1	1	3	1	3	1	0	0		1
900	8/7/2016	3	1	1	38	3		4	1	4	2	1		2	2	1	1		1	1	1	2	1	3	2	1	1	4	1	1	2		1	1	2	1
88	4/13/2016	1	2	1	38	3		4	1	4	2		1	3	1	1	1		1	1	1	3	1	4	2	1	1	1	2	1	1	1	0	1	1	1
31	12/11/2014	1	2	1	38	3	1	4	1	4	2	1	1	3	4	1	3		1	1	4	1	1	2	2	1		4	2	1	4	0	1	1	4	0
14	11/14/2015	1	1	1	39	3	4	4	1	4	2	0	1	2	2	1	1	1	0	0		3	1	3	2	0	1	1	1	0			0	1	4	1
160	11/18/2016	1	2	1	39	3	4	2	1	2	2	1	1	4	1	1	1		0	0		3	1	4	2	1	0		1	1	2		0	1	4	0
1068	4/17/2016	3	2	1	39	3		4	1	2	2	0	1	2	4	1	2		0	1	3	3	1	2	2	0	0		3	1	1		0	1	4	1
61	2/18/2016	1	1	1	39	3	1	4	1	4	2	1	1	2	2	1	2	0	1	1	3	3	1	3	2	1	1	3	3	1	3	0	1	1	4	1
182	1/25/2017	1	1	1	40	3	1	2	1	4	2	1	1	2	4	1	3	1	1	0			0		2	1	0		4	1	3	1	1	1	4	1
91	9/18/2016	1	2	1	40	3	1	3	1	2	2	1	1	4	3	1	4	1	1	1	1	3	1	1	2	1	1	4	4	1	4	1	1	1	3	1
777732	5/11/2016	2	1	1	40	3		4	0		2	0	1	2	3	1	3	1	1	1	3	3	0		2	0	1	3	4	1	4	1	0	0		1
131	8/3/2016	1	2	1	40	3	1	3	0		2	1	1	4	4	0			0	1	3	2	1	3	2	0	0	1	2	0			0	0		1
1408	12/1/2015	2	2	1	40	3	4	2			2	1	1	2	1	1	4		1	1	4	1	1	1	2	1	1	1	4	1	4	1	1	1	4	1
57	3/4/2016	1	1	1	40	3	4	3	1	3	2	1	1	4	3	1	4	1	1	1	4	4	1	4	2	1	1	4	4	1	4	1	1	1	4	1
50	2/15/2016	1	2	1	41	3	4	4	1	4	2	1	1	1	3	1	3	1	1	1	1	3	1	3	2	1	1	1	3	1	3	1	1	1	4	1
134	8/5/2016	1	1	1	41	3	1	1	1	4	2	0	1	1	3	1	4	1	0	1	1	3	1	4	2	0	1	1	3	1	1	1	0	1	1	1
777723	5/11/2016	2	2	1	41	3		3	1	3	2		1	2	2	1	4	1		1	1	1	1	1	2	0	1	3	4	1	4	0	1	1	4	1
161	11/21/2016	1	2	1	41	3	1	2	1	2	2	1	1	2	3	1	3	0	1	1	3	1	1	1	2	1	1	1	1	1	1	0	1	1	2	1
77772	1/13/2016	2	2	1	41	3	2	4	1	2	2	1	1	2	3	1	3	1	1	1	3	1	1	1	2	1	1	1	4	1	4	1	1	1	4	1
11	11/12/2015	1	2	1	41	3	1	2	1	2	2	1	1	4	3	1	3	1	1	1	3	1	1	1	2	1	1	1	3	1	3	1	0	1	3	1
193	2/16/2017	1	1	1	41	3		4	1	4	2	0	1	2	4	1	4	0	1	1	4	3	1	3	2	0	1	1	1	1	3	0	1	1	1	1
1411	12/1/2015	2	2	1	41	3	1	4	1	4	2	0	1	2	3	1	3	0	0	1	4	3	1	4	2	0	1	4	3	1	1	0	1	1	2	1
197	2/25/2017	1	2	1	42	3	2	4	1	4	2	1	1	2	2	1	2	0	1	0		3	1	3	2	1	1	1	3	1	3	1	1	1	1	1
169	12/1/2016	1	2	1	42	3		4	1	4	2	0	1	4	1	1	1	0	0	1	1	2	1	2	2	0	1	2	4	1	4	0	0	1	4	1
4003	12/6/2015	3	1	1	42	3	1	2	1	2	2	1	1	2	3	1	3	1	0	1	3	1	0		2	1	1	1	3	0			1	1	3	1
86	4/12/2016	1	1	1	42	3		4	1	4	2	0	1	2	3	1	3	1	0	1	3	3	1	3	2	0	1	1	3	1	3	1	0	1	4	1
69	3/17/2016	1	1	1	42	3	1	2	1	2	2	1	1	4	3	1	3	0	1	1	3	3	1	1	2	1	1	3		1	1	0	0	1	3	0
59	3/5/2016	1	1	1	43	3	1	2	1	2			1	2	2	0			1	0		3	1	3	2	1	1	3	2	1	2		0	0		1
67	3/16/2016	1	1	1	43	3	2	4	1	3	2	1	0		3	1	2	0	1	0	1	3	1	3	2	1	0	3	4	1	2	1	0	1	3	0
1459	12/1/2015	2	2	1	43	3	1	2	1	2	2	0	1	2	3	1	2	1	0	1	2	1	1	1	2	0	1	1	3	1	3	0	1	1	3	0
213	4/11/2016	1	1	1	43	3	2	2	1	4	2	0	1	2	1	1	4	1	0	1	3	2	1	2	2	1	1	1	3	1	4		1	1	1	1
16	11/19/2015	1	2	1	43	3	1	2	1	4	2	0	1	2	3	0			0	1	3	1	0	3	2	0	0	4	4	0			0	1	4	1
23	11/25/2015	1	1	1	43	3	2	2	1	2	2	1	1	2	3	1	3	1	1	1	3	1	1	1	2	1	1	1	4	1	4	1	1	1	4	1
4014	8/23/2016	3	2	1	43	3		4	1	4	2	0	1	2	2	1	1		0	1	3	3	1	3	2	0	1	2	1	1	1	1	0	1	4	1
63	3/12/2016	1	2	1	43	3	1	4	1	4	2	1	1		1	1	3	1	1	1	4	4	1	4	2	1	1	3	1	1	2	0	1	1	4	0
89	4/14/2016	1	1	1	43	3	1	2	1	4	2	1	1	2	3	1	4	1	0	1	4	1	1	3	2	0	1	3	1	1	3	1	0	1	1	1
69	3/22/2016	1	1	1	44	3	4	4	1	4	2	0	1	2	1	1	3	1	0	0		3	1	3	2	0	0		1	1	3	1	0	1	2	1
777715	2/23/2016	2	2	1	44	3		4	1	4	2	1	1	2	1	1	1	1	1	1	1	1	1	2	2	0	1	1	2	1	1	1	1	1	4	1
81	4/8/2016	1	2	1	44	3	4	4	1	2	2	0	1	4	4	1	4	1	0	1	3	3	1	2	2	0	1	1	1	1	2	0	0	1	4	1
34	1/21/2016	1	1	1	45	3	1	1	1	1	2	1	1	2	3	1	3	1	1	1	1	1	0		2	1	0		4	0			1	1		0
191	2/16/2017	1	1	1	45	3		4	1	2	2	0	1	2	3	1	4	1	0	1	1	3	1	3	2	1	1	3	2	1	2	1	1	1	2	1
171	11/28/2016	1	2	1	45	3		4	1	4	2	1	1	1	4	1	1	0	1	1	3	3	1	3	2	1	1	3	3	1	1	1	1	1	1	1
164	11/23/2016	1	2	1	45	3		3	1	2	2	1	1	2	3	1	3	1	0	1	3	1	1	1	2	0	1	1	4	1	4	1	0	1	4	1
777725	5/11/2016	2	1	1	46	3		1	1	1	2	1	1	1	1	1	2	0	1	0		3	1	3	2	1	1	3	4	1	3	0	1	1	1	1
1454	12/1/2015	2	2	1	46	3	4	4	1	1	2	1	1	2	1	1	1		1	1	2	3	1	4	2	1	1	1	4	1	1		1	1	4	1
175	12/7/2016	1	2	1	46	3		2	1	2	2	1	1	2	3	1	3	1	1	1	3	1	1	1	2	0	0		4	1	4	1	1	0		1
777738	5/13/2016	2	2	1	47	3		4	1	4	2	0	1	2	1	0			0	0		3	1	3	2	0	1	1	1	0			0	1	4	1
55	3/2/2016	1	2	1	47	3	1	4	1	4	2	0	1	1	3	1	2	0	0	1	3	3	1	3	2	0	1	1	4	1	4	0	0	1	1	1
90	4/15/2016	1	2	1	47	3	1		1	4	2	0	1	2	4	0			0	1	3	3	1	3	2	0	1	1		0			0	1	3	1
65	3/14/2016	1	1	1	47	3	1	2	1	4	2	0	1	2	3	0			0	1	3	1	0		2	0	1	1	3	0			0	0		1
2217	12/9/2015	2	1	1	47	3		4	1	4	2	1	1	2	3	1	1	0	1	1	3	3	1	3	2	1	1	1	3	1	3	0	1	1	1	1
777724	5/11/2016	2	2	1	48	4		1	1	2	2	0	0		3	1	3	1	0	0		3														0
40	1/31/2016	1	1	1	48	4	2	4	1	4	2	0	1	2		0			0	1	3	3	1	1	2	0	1	1		0			0	1	4	1
198	2/25/2017	1	1	1	48	4		2	1	4	2	0	1	2	3	0			0	1	3	1	1	3	2	0	1	1	2	1	2	1	0	1	4	1
777718	2/23/2016	2	2	1	48	4	1	4	1	4	2	0	1	2	2	0			0	1	3	3	1	3	2	0	1	1	2	1	2	0	0	1	4	1
777720	2/23/2016	2	2	1	48	4		1	1	4	2	0	1	2	4	1	2	0	0	1	3	2	1	3	2	0	1	1	3	0			0	1	4	1
20	11/22/2015	3	1	1	48	4	1	4	1	4	2	0	1	2	3	1	3	1	0	1	4	3	1	3	2	0	1	1					0	1	4	1
1064	4/17/2016	3	2	1	49	4		2	1	4	2	0	1	2	3	0			0	1	3	1	1	3	2	0	0		2	1	1	1	0	0		1
2252	12/9/2015	2	2	1	49	4		2	1	4	2	0	1	2	4	1	3	1	0	1	3	1	1	1	2	0	1	1	4	1	4	1	0	1	4	1
777727	5/9/2016	2	2	1	49	4		2	1	2	2	1	1	2	1	1	1	1	0	1	3	3	1	3	2	0	1	1	1	1	1	1	0	1	4	1
144	9/27/2016	1	1	1	49	4	2	2	1	2	2	0	1	2	3	1	3	1	0	1	3	1	1	1	2	0	1	1	4	1	4	1	0	1	4	1
166	11/25/2016	1	1	1	50	4	1	4	1	4	2	0	1	2	3	0			0	1	2	1	1	1	2	0	1	3	3	1	3	0	1	1	3	1
777743	5/24/2016	2	1	1	50	4		2	1	4	2	0	1	2	3	1	2	1	0	1	3	1	1	3	2	0	1	1	4	1	4	1	0	1	4	1
113	6/17/2016	1	2	1	51	4		4	1	4	2		1	2	3	1	2	1	1	1	2	3	1	3	2	1	0		2	0			0	1	2	1
4016	9/13/2016	1	1	1	51	4	1	4	0		2	0	1	2	3	0			0	1	2	3	0		2	0	1	1	2	0			0	0		0
777733	5/9/2016	2	2	1	51	4		4	1	4	2	0	1	2	4	1	4	1	0	1	3	3	1	1	2	0	1	1	2	0			0	1	4	0
79	4/5/2016	1	2	1	51	4	4	2	1	2	2	0	1	2	3	1	3	0	0	1	3	1	1	1	2	0	1	1	4	1	4	0	0	1	4	1
73	3/31/2016	1	2	1	51	4	4	1	1	4	2	0	1	3	3	1	4	1	0	1	3	3	1	4	2	0	1	1	3	1	4	1	0	1	4	1
111	6/8/2016	1	2	1	51	4	2	4	1	4	2	0	1	4	3	1	3	1	1	1	3	1	1	1	2	1	1	1	2	1	2	0	1	1	2	1
77771	1/13/2016	2	1	1	52	4	2	1	0		2	0	1	2	1	0			0	0		1	0		2	0	0		1	0			0	0		0
143	9/14/2016	1	2	1	52	4	1	1	1	1	2	1	1	4	1	1	1		0	1	1															0
109	6/3/2016	1	1	1	52	4	1	4	1	4	2	0	1	2	1	1	1	0	0	1	3	3	0	4	2	0	1	3	3	1	3	0	0	1	4	1
119	7/13/2016	1	2	1	52	4	1	4	1	4	2	0	1	2	3	1	4	0	0	1	3	1	1	1	2	0	1	1	3	1	4	0	0	1	4	1
185	2/6/2017	1	2	1	53	4	1	1	1	4	2	0	1	2	3	1	3	0	0	1	1	3	1	1	2	0	1	1	1	1	3	1	0	1	4	1
46	5/2/2016	1	2	1	53	4	1	2	1	4	2	0	1	2	2	1	3	1	0	1	2	3	0		2	0	1	3	4	1	1	1	0	1	2	0
150	10/26/2016	1	1	1	53	4	1	2	1	4	2	0	1	2	4	1	4	0	1	1	3	3	0		2	1	1	1	1	1	2	0	0	1	3	1
77773	1/13/2016	2	2	1	53	4	2	2	1	4	2	0	1	2	2	1	3	1	1	1	4	2	1	4	2	1	0		4	1	4	1	1	1	4	1
148	10/21/2016	1	1	1	54	4	2	2	1	4	2	0	1	2	1	0			0	1	3	3	1	3	2	0	1	1	2	0			0	1	4	1
777722	5/11/2016	2	2	1	54	4		2	1	4	2	0	1	2	3	0	2	1	0	1	3	1	1	3	2	0	1	1	4	1	1	1	0	1	4	1
2253	12/9/2015	2	2	1	54	4		2	1	4	2	0	1	4	2	1	1	1	0	1	3	3	1	3	2	0	1	3	2	1	1	1	0	1	4	0
777728	5/9/2016	2	1	1	54	4		4	1	4	2	1	1	4	3	1	3	1	1	1	3	3	1	3	2	1	1	3	2	1	2	1	1	1	2	1
777719	2/23/2016	2	2	1	55	4	1	2	1	4	2	0	1	2	3	0			0	1	3	1	0		2	0	1	1	2	0			0	1	4	1
114	6/27/2016	1	2	1	56	4		4	0		2		1	2		0			0	1	3	3	0		2	0	1	2	1	0			0	1	2	1
777716	2/23/2016	2	1	1	56	4	2	2	1	2	2	0	1	2	3	1	3	0	0	1	3	1	1	1	2	0	1	1	4	1	4	0	0	1	4	1
3	10/17/2015	1	2	1	56	4	4	4	1	4	2	0	1	2	3	1	1	0	1	1	3	1	1	1	2	1	1	1	4				1	1	4	1
100	4/30/2016	1	2	1	57	4	2	4	1	4	2	0	1	2	4	1	4	1	0	1	2	3	1	3	2	0	1	2	4	0			0	1	1	1
42	2/4/2016	1	2	1	57	4	European/Pacific Isl	4	1	2	2	0	1	2	4	0			0	1	2	3	1	1	2	0	1	1	4	1	1		0	1	1	1
2223	4/19/2016	2	2	1	57	4		4	1	4	2	0	1	3	3	1	1		1	1	3	3	1	2	2	0	1	3	2	1	4		0	1	4	1
145	9/30/2016	1	1	1	59	4	2	2	1	4	2	0	1	2	4	0		1	0	0		3	0		2	0	1	2	2	0		1	0	0		1
77770	1/13/2016	2	2	1	59	4	1	2	1	4	2	0	1	2	2	1	3	1	0	0		3	0	3	2	0	0		4	0			0	1	4	1
777740	5/16/2016	2	2	1	59	4		4	1	4	2	0	1	1	2	1	2	1	0	1	3	3	1	3	2	0	1	1	3	1	3	1	0	1	4	1
85	4/12/2016	1	1	1	59	4	1	2	1	4	2	0	1	2	3	1	4	1	0	1	3	1	1	3	2	0	1	1	4	1	3	1	0	1	4	1
146	9/30/2016	1	1	1	59	4	2	4	0		2	0	1	2	3	0		1	0	1	3	1	1	3	2	0	1	1	4	0		1	0	1	4	1
4013	8/30/2016	3	2	1	60	5		2	1	4	2	0	1	2	3	1	1	1	0	1	3	1	1	3	2	0	1	1	4	1	2	0	0	1	4	1
184	2/3/2017	1	1	1	60	5	4	2	1	4	2	0	1	2	3	1	1	1	0	1	3	1	1	3	2	0	1	1	4	1	3	1	0	1	4	1
27	11/28/2015	1	2	1	61	5	1	4	1	3	2	0	1	1	1	1	2	1	0	1	1	2	1	4	2	0	1	1	1	1	3	1	0	1	1	1
2	10/3/2015	1	2	1	61	5	4	2	1	4	2	0	1	2	3	1	1	0	0	1	3	1	1	3	2	0	1	1	4	1	2	1	0	1	4	1
136	8/9/2016	1	2	1	62	5		4	1	3	2	1	1	2	2																					0
777734	5/11/2016	2	2	1	62	5		2	1	2	2	0	1	2	2	1	2	0	0	1	2	3	1	3	2	0	1	1	3	1	3	0	0	1	4	1
1	10/24/2015	1	1	1	62	5	1	2	1	4	2	0	1	2	4	1	1	1	0	1	3	1	1	4	2	0	1	1	4	1	2	1	0	1	4	1
167	11/25/2016	5	2	1	63	5		2	1	3	2	0	1	2	2	0			0	1	3	3	0		2	0	1	3	2	0			0	1	2	1
45	2/9/2016	1	2	1	64	5	4	3	1	4	2	0	1	1	1	1	3	1	0	1	3	3	1	4	2	0	1	1	1	1	3	1	0	1	4	1
48	2/10/2013	1	2	1	64	5	1	2	1	4	2	0	1	2	2	0			0	1	3	3	1	1	2	0	0		1	0			0	1	4	1
9	11/10/2015	1	2	1	65	5	2	1	1	4	2	0	1	2	4	1	4	1	0	1	3	3	1	3	2	0	1	1	3	1	3	0	0	1	1	1
901	8/7/2016	3	1	1	65	5		4	1	4	2	0	1	2	1	1	4		0	1	4	3	1	3	2	0	1	3	4	1	4	0	0	1	3	1
37	1/23/2016	1	2	1	67	5	1	4	1	1	2	0	1	1	4	1	1	1	0	1	2	4	0		2	0	1	2	2	0		1	0	1	4	1
174	12/3/2016	1	1	1	67	5		2	1	4	2	0	1	2	2	1	4	1	0	1	3	1	1	3	2	0	1	1	4	1	2	1	0	1	4	1
36	1/23/2016	1	2	1	69	5	2	4	1	2	2	0	1	2	4	1	3	1	0	1	3	3	1	3	2	0	1	1	2	0		1	0	1	3	1
130	7/29/2016	1	1	1	70	5	4	3	1	4	2	0	1	2	4	0			0	1	2	1	1	3	2	0	1	1	4	0			0	1	4	1
56	3/2/2016	1	2	1	70	5	1	2	1	1	2	0	1	2	2	1	4	1	0	1	3	3	1	4	2	0	1	1	1	1	3	1	0	1	4	1
4	11/4/2015	1	1	1	70	5	1	2	1	4	2	0	1	2	3	1	1	1	0	1	3	1	1	3	2	0	1	1	4	1	2	1	0	1	4	1
128	7/27/2016	1	1	1	70	5		2	1	4	2	0	1	2	3	1	1	1	0	1	3	1	1	3	2	0	1	1	4	1	3	1	0	1	4	1
26	11/28/2015	1	2	1	71	5	2	2	1	4	2	0	1	2	2	1	4	1	0	1	2	3	1	2	2	1	1	1	1	1	2	1	0	1	4	1
35	1/23/2016	1	2	1	71	5	1	2	1	4	2	1	1	2	3	1	4	0	1	1	3	3	1	3	2	1	1	1	4	1	4	0	1	1	2	1
32	12/14/2015	1	2	1	73	6	1	2	1	4	2	0	1	2	3	0			0	1	3	1	0		2	0	1	1	4	0			0	1	4	1
51	2/20/2016	1	1	1	73	6	1	2	1	1	2	1	1	2	3	0		1	0	1	3	1	1	3	2	0	1	1	4	0		1	0	1	4	1
28	11/28/2015	1	1	1	74	6	1	4	1	4	2	0	1	2	4	1	3	1	0	1	2	3	1	3	2	0	1	1	4	0			0	1	4	1
142	8/29/2016	1	1	1	74	6		4	1	4	2	0	1	2	2	1	1	1	0	1	3	3	1	3	2	0	1	1	2	1	3	1	0	1	4	1
49	2/13/2016	1	2	1	74	6	2	2	1	4	2	0	1	2	3	1	1	1	0	1	3	1	1	3	2	0	1	1	4	1	2	1	0	1	4	1
106	5/10/2016	1	1	1	75	6	2	2	1	4	2	0	1	2	3	0			0	1	3	1	1	3	2	0	1	1	4	0			0	1	4	1
66	3/15/2016	1	2	1	75	6	1	2	1	4	2	0	1	2	3	0			0	1	3	1	1	3	2	0	1	1	4	0			0	1	4	1
138	8/12/2016	1	1	1	76	6	1	2	1	4	2	0	1	2	3	0			0	1	3	1	1	3	2	0	1	1	2	0			0	0		1
82	4/9/2016	1	2	1	77	6		2	1	4	2	0	1	2	2	1	3	1	0	1	2	1	1	3	2	0	1	1	4	1	2	1	0	1	4	1
4008	8/16/2016	3	2	1	78	6		4	1	4	2	0	1	2	3	1	3	1	0	1	2	3	1	3	2	0	1	2	3	1	3	1	0	1	2	1
107	5/14/2016	1	1	1	78	6	2	2	1	4	2	0	1	2	3	0			0	1	3	1	1	3	2	0		1	4	0			0	1	4	1
4002	12/6/2015	3	2	1	78	6	1	4	1	2	2	0	1	2	4	1	3	1	0	1	3	4	1	1	2	0	1	1	3	1	4	1	0	1	4	1
177	1/18/2017	1	1	1	79	6	2	2	1	4	2	0	1	2	3	1	1	0	0	1	3	1	1	3	2	0	1	1	4	1	2	0	0	1	4	1
110	6/4/2016	1	1	1	79	6	2	2	1	2	2	0	1	2	3	0			0	1	3	3	1	1	2	0	1	3	4	0			0	1	4	1
112	6/10/2016	1	2	1	80	6	1	2	1	4	2	0	1	2	3	1	1	1	0	1	3	1	1	3	2	0	1	1	3	1	2	1	0	1	4	1
141	8/26/2016	1	2	1	80	6	2	2	1	4	2	0	1	2	3	1	1	1	0	1	3	1	1	3	2	0	1	1	4	1	2	1	0	1	4	1
7775	6/25/2016	4	2	1	83	6	?	4	1	2	2	0	1	2	2	1	3	1	0	1	3	3	1	1	2	0	1	1	3	1	4	0	0	1	4	1
1067	3/21/2016	3	1	2		4	Unknown	1	0			0	1	2	4	1	3	2	0	1	3	3	1	1	0	0	1	1	2	1	2	2	0	1	4	1
98	4/29/2016	1	1	2	36	3	1	2	0			0	1	2	4	1	4	2	0	0		2	0			0	1	1	2	0		2	0	1	4	1
186	2/8/2017	1	2	2	36	3	4	4	1	1	1	1	1	1	1	1	4	2	1	1	1	2	1	2	1	1	1	1	1	1	1	2	1	1	4	1
94	4/22/2016	1	2	2	36	3	1	2	1	1	1	1	1	3	4	1	2	2	1	1	1	4	1	1	1	1	1	4	2	1	3	2	1	1	1	1
93	4/22/2016	1	1	2	36	3	1	1	1	1	1	0	1	1	3	1	3	2	0	1	3	1	1	1	1	0	1	1	4	1	4	2	0	1	4	1
105	4/29/2016	1	1	2	36	3	2	2	1	2	0	1	1	2	3	1	3	2	1	1	3	1	1	1	1	1	1	1								1
92	4/21/2016	1	2	2	36	3	1	2	1	2	1	1	1	2	3	1	3	2	1	1	3	4	1	4	1	1	1	1	2	1	3	2	1	1	4	1
1455	12/1/2015	2	2	2	36	3	1	2	1	2		0	1	2	4	1	4	2	1	1	3	3	1	3		0	1	3	2	1	2	2	0	1	3	1
121	7/19/2016	1	2	2	36	3	1	1	0			1	1	2	2	1	1	2	1	1	4	1	1	3	1	1	1	1	2	1	3	2	1	1	4	1
4004	2/7/2016	3	2	2	37	3	4	4	1	4					4	1	3																			0
77666	4/3/2016	3	1	2	37	3		1	1	1	0	1	1	2	4	1	4	2	1	1	3	4	1	4	1	1	1	4		1	2	2	1	1	4	1
19	11/20/2015	2	1	2	37	3		2	1	2	1	1	1	2	3	1	3	2	1	1	3	1	1	1	1	1	1		4	1	4	2	1	1	4	1
102	5/6/2016	1	1	2	37	3	1	2	1	2	1	0	1	2	3	1	3	2	0	1	3	2	1	2	1	0	1	2	2	1	2	2	0	1	2	1
181	1/25/2017	1	2	2	37	3	2	2	1	2	1	0	1	2	3	1	2	2	1	1	3	1	1	1	1	1	1	1	4	1	4	2	1	1	4	1
147	10/19/2016	1	2	2	37	3	4	3	1	3	1	1	1	3	4	1	1	2	0	1	3	2	1	2	1	0	1	2	4	1	3	2	0	1	2	1
104	4/29/2016	1	2	2	37	3	1	1	1	1	1	0	0		4	1	4	2	0	1	4															0
63	7/26/2016	1	2	2	38	3	2	3	1	2	1	0	0		1	0		2	0	0		1	1	1	1	0	0									0
192	2/16/2017	1	1	2	38	3	4	1	1	4	1			1	3	0		2					1	1		1	0			1	4	1				0
4015	8/23/2016	3	2	2	38	3		2	1	4	0	1	1	2	4	1	3	2	0	1	1	4	1	1	0	0	1	3	4	1	2	2	0	1	1	0
21	11/24/2015	2	2	2	38	3	4	2	0		1	0	1	2	4	1	1	2	0	1	1	1	1	2	1	0	1	1	2	1	3	2	0	1	1	1
18	11/23/2015	1	2	2	38	3	2	1	1	4	1	1	1	3	4	1	1	2	1	1	3	3	1	2	1	1	1	2	2	1	3	2	1	1	1	1
87	4/13/2016	1	2	2	38	3	1	2	1	2	0	1			2	1	4	2	1	1	4	4	0													0
178	1/21/2017	1	2	2	38	3		4	1	4	1	1	1	2	4	1	4	2	1	1	4	3	1	3	1	1	1	1	2	1	2	2	1	1	2	1
96	4/28/2016	1	2	2	38	3	1	1	1	2	0	1	1	3	1	1	2	2	1	1	4	4	1	1												0
103	5/9/2016	1	1	2	39	3	1	4	1	2	1	0	0		3	1	2	2	0	0		4	0			0	0		3	0		2	0	0		1
95	4/22/2016	1	1	2	39	3	4	2	1	2	1	0	1	2	1	1	1	2	0	1	1	1	1	1	1	0	1	1	4	1	4	2	0	1	4	1
156	11/4/2016	1	2	2	39	3	1	1	1	2	1	0	1	2	3	1	3	2	0	1	2	3	1	3	1	0		2	1	1	1	2	0	1	2	1
4012	8/30/2016	3	1	2	39	3		2	1	3	0	1	1	4	4	1	3	2	1	1	2	4	1	3	0	0	1	4	4	1	3	2	1	1	1	0
170	12/1/2016	1	1	2	39	3		1	1	4	1	0	1	2	2	1	1	2	0	1	3	4	1	1	0	0	1	1	4	1	3	2	0	0		1
4006	2/7/2016	3	2	2	39	3		1	1	1	1	1	1	2	4	1	4	2	1	1	3	1	1	1	1	0	1	1	2	1	2	2	1	1	4	1
6	11/4/2015	1	2	2	39	3	1	2	1	3	1	0	1	4	4	1	4	2	0	1	4	3	1	3	1	0	1	4	2	0		2	0	1	3	1
777713	2/23/2016	2	2	2	40	3	1	4	0			0	0		2	0		2	0	1	2	1	0			0	0		1	0		2	1	1	3	0
1413	12/1/2015	2	2	2	40	3	1	2	1	3		0	1	3	4	1	3	2	0	1	2	4	1	3		0	1	4	4	1	3	2	0	1	4	1
13	11/14/2015	1	2	2	40	3	1	1	1	1	1	0	1	2	4	1	4	2	1	1	3	3	1	3	1	1	1	1	2	1	2	2	1	1	1	1
77778	1/14/2016	2	1	2	40	3	4	4	1	1	0	1	1	2	4	1	3	2	1	1	3	4	1	1	0	1	1	1	2	1	4	2	1	1	4	1
22	11/24/2015	2	2	2	40	3	1	2	0		1	0	1	2	4	1	4	2	0	1	3	2	1	2	1	0	1	1	2	1	2	2	0	1	4	1
157	11/17/2016	1	1	2	40	3	1	2	0			1	1	2	2	0		2	1	1	3	1	0			1	1	1	4	1	4	2	1	1	4	1
154	11/2/2016	1	2	2	40	3	1	4	1	4	1	1	1	3	4	1	4	2	1	1	3	2	1	2	0	1	1	4	2	1	2	2	1	1	3	0
152	10/27/2016	1	1	2	40	3	2	2	1	2	1		1	2	4	1	4	2	1	1	4	1	1	1		1	1	1	4	1	2	2	1	1	4	1
179	1/21/2017	1	2	2	41	3		4	0			0	1	2	3	1	3	2	0	1	2	2	0			0	1	1	3	1	1	2	0	0		1
97	4/28/2016	1	2	2	41	3	1	1	1	1	1	1	1	2	4	1	4	2	0	1	3	2	1	2	1	0	1	1	2	1	2	2	0	1	1	1
777712	1/14/2016	2	2	2	41	3	2	2	1	2	0	1	0		3	0		2	1	1	4	4	1	3	1	1	0		2	0		2	1	0		1
99	4/30/2016	1	2	2	41	3	2	2	1	2		1	0		4	1	4	2	1	1	4	2	1	2	1	1	1	1	1	1	1	2	1	1	1	0
2254	12/9/2015	2	2	2	42	3		3	1	3	0	0	1	2	3	1	3	2	0	1	2	3	1	2	0	1	1	1	1	1	1	2	1	1	1	1
17	11/20/2015	1	2	2	43	3	1	3	0		1	0	0		4	0		2	0	0		2	0			0	0									0
77	4/3/2016	1	1	2	43	3	1		1	2	0	1	1	2		1	4	2	0	1	4		1	1	0	0	1	1		1	4	2	0	1	4	1
172	11/28/2016	1	1	2	44	3	1	1	1	2	0	0	1	2	3	1	4	2	0	1	3	4	1	4	1	0	1	3	2	1	2	2	0	1	2	1
24	11/26/2015	1	2	2	44	3	1	1	1	2	1	1	1	2	2	1	2	2	1	1	3	2	1	2	1	1	1	1	1	1	1	2	1	1	1	1
78	4/3/2016	1	2	2	44	3	2	2	1	2	0	1	1	2	3	1	3	2	1	1	3	1	1	1	0	1	1	1	2	1	2	2	1	0		1
1419	12/3/2015	2	1	2	45	3	4	2	1	2	1	0	1	2	4	1	4	2	0	0		1	1	1	0	0	1	1	2	1	4	2	0	1	4	1
77665	4/3/2016	3	2	2	45	3		1	0			0	1	2	3	1	2	2	0	1	1	1	1		0	0	1	2	2	1	4	2	0	1	4	1
77776	1/14/2016	2	1	2	45	3	2	2	1	2	1	0	1	2	3	1	3	2	1	1	3	1	1	1	1	1	1	1	2	1	2	2	1	1	2	1
137	8/11/2016	1	2	2	45	3	1	2	0			0	0			0		2	0	1	4	4	1	1		0	0			0		2	0	0		0
52	2/18/2016	1	2	2	45	3	2	2	1	3		0	1	2	4	1	4	2	0	1	4	1	1	1		0	1	1								0
77775	1/14/2016	2	2	2	46	3	4	1	0			1	1	2	2	0		2	1	1	1	3	0			0	1	3	2	0		2	1	0		1
777717	2/23/2016	2	1	2	46	3	Arab	2	1	2	1	0	1	2	2	1	2	2	0	1	2	1	1	1	1	0	1	1	2	1	2	2	0	1	2	1
183	2/1/2017	1	2	2	46	3	2	4	1	4	0	1	1	2	4	1	4	2	1	1	3	1	1	3	0	1	1	4	2	1	2	2	1	1	2	1
777714	2/23/2016	2	2	2	46	3	1	2	1	2		0	1	2	4	1	4	2	0	1	3	1	1	1	0	0	1	4	2	1	3	2	0	1	3	1
1418	12/3/2015	2	1	2	46	3	1	3	1	2	0	1	1	2	4	1	4	2	1	1	4	1	1	1	0	0	1	1	4	1	4	2	1	1	4	1
71	3/25/2016	1	2	2	46	3	2	1	1	1	0	1	1	2	4	1	4	2	1	1	4	1	1	1		1	1	1	2	1	2	2	1	1	2	1
77774	1/14/2016	2	1	2	46	3		2	1	2	1	0	1	2	4	1	4	2	0	1	4	1	1	1	1	0	1	1	2	1	2	2	1	1	4	1
155	11/4/2016	1	2	2	47	3		3			1	1	1	2	2	1	2	2	1	1	1	1	1	1		1	1	1	4	1	4	2	1	1	4	1
77667	4/3/2016	3	2	2	47	3		2	1	2		0	1	2	3	1	3	2	1	1	3	1	1			0	1	1	4	1	4	2	0	1	4	1
77777	1/14/2016	2	1	2	47	3	2	1	0			0	1	2	4	1	1	2	0	1	3	4	1	1	0	0	1	1	2	1	4	2	0	1	4	1
4007	8/16/2016	3	1	2	47	3		2	1		0	1	1	2	3	1	3	2	1	1	3	1	1	1	1	1	1	1	3	1	3	2	1	1	3	1
777721	5/11/2016	2	2	2	48	4		2	0			0	0		3	1	2	2	0	0		1	1	1	1	0	0		2	1	4	2	0	0		1
151	10/27/2016	1	1	2	48	4		1	1	1	1	1	1	2	4	1	4	2	1	1	1	4	1	4	0	1	1	1	2	1	1	2	1	1	4	1
118	6/7/2016	1	1	2	48	4	1	2	0			0	1	2	3	1	4	2	0	1	3	1	0			0	1		4	1	2	2	0	1	4	1
5	10/31/2015	1	1	2	49	4	4	2	0			1	0		4	0		2	1	1	1	1	0			1	0			0		2				0
777731	5/13/2016	2	2	2	49	4		1	0			0	1	3	4	1	4	2	0	1	2	1	0			0	1	3	1	1	3	2	0	1	4	1
25	11/28/2015	1	1	2	49	4	2	2	1	1	0	0	1	2	3	1	4	2	0	1	3	1	1	2	0	0	1	1	4	1	2	2	0	1	3	1
4011	8/16/2016	3	2	2	49	4		1	1	4	1	0	1	2	4	1	4	2	0	1	4	1	1	1	1	0	1	1	3	1	2	2	0	1	4	1
2225	4/19/2016	2	2	2	50	4		2	1	2		0	1	2	4	1	4	2	0	1	3	1	1	1	1	0	1	1	2	1	2	2	0	1	4	1
163	11/23/2016	1	1	2	50	4	4	2	0			0	1	2	4	1	1	2	0	1	4	1	1	4	1	0	1	1	4	1	2	2	0	1	4	1
139	8/17/2016	1	2	2	51	4	1	2	1	4	1	0	1	2	4	0		2	0	1	3		0			0	0		2	1	2	2	0	1	4	1
77664	4/3/2016	3	2	2	51	4		3				0	1	2	4	0		2	0	1	3	1	0			0	1	2	4	1	4	2	0	1	4	1
194	2/16/2017	1	2	2	51	4	1	2	0			1	1	2	3	0		2	1	1	3	1	0			0	1	1	4	1	2	2	0	1	4	1
4005	2/7/2016	3	2	2	51	4	1	2	0			0	1	2	4	1	4	2	0	1	4	4	0			0	1	2	2	1	2	2	0	1	2	1
777730	5/11/2016	2	1	2	51	4		2	1	1	0	1	1	2	4	1	4	2	1	1	4	1	1	1	0	1	1	4	2	1	2	2	1	1	3	1
30	12/10/2015	1	1	2	52	4	1	1	1	1		1	1	2	4	1	3	2	1	1	3	3	1	1	1	1	1	1	4	1	4	2	1	1	4	1
75	4/2/2016	1	1	2	52	4	1	2	1	3	1	0	1	2	4	0		2	0	1	3	4	0			0	1	3	2	0		2	0	1	4	1
44	2/8/2016	1	1	2	52	4	1	1	1	3	1	0	1	2	1	0		2	0	1	4	2	1	1	1	0	1	3	4	1	2	2	0	1	4	1
117	7/7/2016	1	1	2	52	4	1	2	0			0	1	2	2	0		2	0	1	4	2	0			0	1	1	4	1	2	2	0	1	4	1
133	8/4/2016	1	1	2	53	4	4	2	1	2	1	1	1	1	2	1	4	2	1	1	3	3	1	3	1	1	1	3								0
122	7/20/2016	1	2	2	53	4	2	2	0			0	1	2	3	1	4	2	0	1	3	1	1	2	0	0	1	1	4	1	2	2	0	1	4	1
135	8/6/2016	1	2	2	53	4	4	3	1	3	1	0	1	1	4	1	4	2	1	1	4	3	1	3	0	1			2	1	2	2	1	1	4	1
777726	5/9/2016	2	1	2	54	4		1	1	1	1	1	1	2	4	1	4	2	1	1	3	2	1	2		1	1	3	2	1	2	2	1	1	4	1
777729	5/11/2016	2	2	2	54	4		4	0			0	1	2	4	1	4	2	0	1	3	2	0			0	1	1	2	1	2	2	0	1	4	1
153	10/28/2016	1	1	2	55	4	1	2	0			0		2	3		4	2	0	0		1	0			0	1	1	4	1	2	2	0	1	4	1
10	11/12/2015	1	2	2	55	4	1	3	1	1	1	0	1	2	3	1	4	2	0	1	3	1	1	3	1	0	1	1	4	1	2	2	0	1	4	1
777735	5/18/2016	2	2	2	55	4		2	1	2	0	1	1	2	3	1	3	2	1	1	3	1	1	1	0	1	1	1	4	1	4	2	1	1	4	1
8000	3/20/2016	3	1	2	55	4		2	0			0	1	2	4	1	4	2	0	1	3	2	0			0	1	1	2	1	2	2	0	1	4	1
777711	1/14/2016	2	1	2	55	4	2	1	1	1	1	1	1	2	4	1	4	2	1	1	4	2	1	2	1	1	1	1	2	1	2	2	1	1	4	1
72	3/29/2016	1	2	2	55	4	2	2	1	4		0	1	2	1	1	2	2	0	1	4	1	1	3		0	1	1	2	1	2	2	0	1	3	1
15	11/16/2015	1	2	2	56	4	1	1	1	4	1	0	1	2	4	1	4	2	0	1	3	4	1	4	1	0	1	1	2	0		2	0	1	4	1
80	4/5/2016	1	1	2	56	4	1	2	0			0	1	2	3	1	4	2	0	1	3	2	0			0	1	2	2	1	2	2	0	0		1
2222	4/19/2016	2	2	2	57	4		2	1	2		0	1	2	4	1	3	2	0	1	3															1
777737	5/16/2016	2	2	2	57	4		1	0			0	1	2	4	1	4	2	0	1	3	3	0			0	1	1	2	1	2	2	0	1	4	1
777710	1/14/2016	2	2	2	58	4	2	2	0			0	0																			2				0
120	7/19/2016	1	1	2	58	4	1	1	1	3	1	0	1	2	4	1	4	2	0	1	3	3	1	3	1	0	0		2	1	2	2	0	1	4	1
12	11/12/2015	1	2	2	58	4	1	2	1	4	0	0	1	2	4	1	4	2	0	1	4	1	1	4	0	0	1	4	2	1	2	2	0	1	4	1
116	7/5/2016	1	1	2	59	4		1	0			0	1	2	4	1	4	2	0	0		3	0			0	1	1	2	1	2	2	0	0		0
115	6/29/2016	1	2	2	59	4	1	3	1	2	1	0	1	2	4	1	2	2	0	1	4	1		3		0	1	1	4	1	2	2	0	0		1
777736	5/16/2016	2	1	2	59	4		2	0			0	1	2	4	0		2	0	1	4	1	0			0	1	1	4	1	2	2	0	1	4	1
77779	1/14/2016	2	1	2	59	4	2	2	0			0	1	2	4	1	4	2	0	1	4	1	1	1	1	0	1	1	2	1	2	2	0	1	2	1
68	3/16/2016	1	1	2	60	5	1	2	1	3	1	0	1	2	3	1	4	2	0	1	3	2	0			0	1	2	4	1	2	2	0	1	4	1
126	7/26/2016	1	1	2	61	5	2	3	0			0	1	2	4	1	1	2	0	1	3															0
777739	5/13/2016	2	1	2	61	5		3	0			0	1	2	4	0		2	0	1	3	3	0			0	1	1	2	0		2	0	1	4	1
2227	4/20/2016	2	1	2	62	5		2	0			0	1	2	4	0		2	0	0		1	0			0	1	1	4	1	2	2	0	1	4	1
173	12/3/2016	1	1	2	63	5		3	1	1	0	0	1	2	1	1	2	2	0	1	3	3	1	2	0	0	1	1	2	1	3	2	0	1	4	1
38	1/30/2016	1	1	2	64	5	1	4	0			0	1	2	2	0		2	0	1	3	3	0			0	1	1	2	0		2	0	1	4	1
149	10/21/2016	1	1	2	64	5	2	2	1	4	1	0	1	2	4	1	4	2	0	1	3	3	1	3	1	0	1	1	2	1	2	2	0	1	4	1
76	4/2/2016	1	2	2	66	5	4	2	0			0	1	2	4	1	4	2	0	1	3	4	0			0	0		2	1	2	2	0	1	4	1
168	11/29/2016	1	1	2	67	5		3	1	1	1	0	1	2	4	1	4	2	0	1	3	4	0			0	1	1	2	1	2	2	0	1	4	1
180	1/23/2017	1	2	2	68	5	4	2	1	3	1	0	1	2	3	1	4	2	0	1	3	2	1	3	1	0	1	2		1	2	2	0	1	4	1
33	1/20/2016	1	1	2	68	5	1	2	1	3	1	0	1	2	3	1	4	2	0	1	3	1	1	4	1	0	1	1	4	1	2	2	0	1	4	1
8001	3/20/2016	3	2	2	68	5		2	1	3	1	0	1	2	2	1	1	2	0	1	4	3	1	2	1	0	1	1	3	1	2	2	0	1	4	1
29	12/3/2015	1	2	2	69	5	4	2	1	4	1	0	1	2	3	1	4	2	0	1	3	1	0			0	1	1	4	1	2	2	0	1	4	1
77668	4/3/2016	3	2	2	70	5		3	0			0	1	1	4	1	4	2	0	0	3	2	1	2	1	0	1	1	2	1	1	2	0	1	2	1
70	3/24/2016	1	2	2	70	5	1	2	0			0	1	2	3	1	4	2	0	1	3	1	0			0	1	1	4	1	2	2	0	1	4	1
74	3/31/2016	1	1	2	71	5	1	4	0			0	1	2	4	0		2	0	0		1	0			0	1	1	4	1	2	2	0	1	4	1
4009	8/16/2016	3	2	2	71	5		3	1	4	1	0	1	2	4	1	2	2	0	1	2	2	1	1	1	0	1	1	4	1	2	2	0	1	3	1
58	3/5/2016	1	1	2	71	5	1	2	0			0	1	2	3	1	4	2	0	1	3	1	0			0	1	1	4	1	2	2	0	1	4	1
53	2/27/2016	1	2	2	72	6	1	2	1	1	1	0	1	2	2	1	3	2	0	1	3															1
4001	12/6/2015	3	1	2	72	6	4	4	0			0	1	2	2	0		2	0	1	4	4	0			0	1	1	2	1	2	2	0	1	4	1
132	8/3/2016	1	1	2	73	6	1	3	0			0	1	2	1	1	3	2	0	0		4	0			0	1	1	4	1	4	2	0	1	4	1
39	1/31/2016	1	1	2	74	6	2	4	0			0	1	2	4	0		2	0	1	3	2	0			0	1	1	2	0		2	0	0		1
7771	6/25/2016	4	2	2	75	6	?	3	1	4	1	0	1	2	1	1	1	2	1	1	3	4	0		1	0	1	4	2	1	2	2	0	1	4	1
7772	6/25/2016	4	2	2	75	6	?	3	0			0	1	2	4	0		2	0	1	3	2	0			0	1	1	2	0		2	0	1	4	1
124	7/25/2016	1	2	2	76	6		4	1	4	0	0	1	2	4	1	4	2	1	1	3	2	0			0	1	1	2	1	2	2	0	1	4	1
38	1/30/2016	1	2	2	76	6	1	2	0			0	1	2	3	1	4	2	0	1	3	1	0			0	1	1	4	1	2	2	1	1	4	1
4010	8/16/2016	3	1	2	78	6		1	0			0	1	2	4	0		2	0	1	3	3	0			0	1	1	2	0		2	0	1	1	0
43	2/8/2016	1	1	2	78	6	1	2	1	1	1	0	1	2	3	1	4	2	0	1	3	1	1	2	1	0	1	1	4	1	2	2	0	1	4	1
777742	5/23/2016	4	2	2	78	6		2	1	4	1	0	1	2	4	0		2	0	1	4	1	1	2	1	0	1	1	4	1	2	2	0	1	3	1
41	1/31/2016	1	1	2	79	6	1	4	1	3	0	0	1	2	4	1	4	2	0	1	3	4	1	3	0	0	1	1	2	1	2	2	0	1	4	1
777741	5/23/2016	4	2	2	79	6		3	1	1	1	0	1	2	4	1	4	2	0	1	4	3	0			0	1	1	2	1	2	2	0	1	4	1
47	2/9/2016	1	1	2	82	6	1	2	1	3	1	0	1	2	4	1	1	2	0	1	3	3	1	4	2	0	1	1	1	1	2	2	0	1	4	1
7	11/7/2015	1	1	2	83	6	3	2	1	3	1	0	1	2	3	1	4	2	0	1	3	1	1	3	1	0	1	1	4	1	2	2	0	1	4	1
108	6/3/2016	1	1	2	83	6	1	2	1	3	1	0	1	2	3	1	4	2	0	1	3	1	1	3	1	0	1	1	4	1	2	2	0	1	4	1
